# Supplementary material for: A Glycemia-Based Nomogram for Predicting Outcome in Stroke Patients after Endovascular Treatment
Source: MDPI journal article supplement (doi:10.3390/brainsci12111576), 2022-11-18
Supplement: s1 [file s1]

**Table S1 Receiver operating characteristic of glycemia to predict poor functional outcome**

|                    | Area under the curve | 95% confidence interval | P      |
|--------------------|----------------------|-------------------------|--------|
| Acute glycemia     | 0.692                | 0.653-0.730             | <0.001 |
| Chronic glycemia   | 0.561                | 0.518-0.603             | 0.005  |
| A/C glycemic ratio | 0.670                | 0.631-0.709             | <0.001 |
| $\Delta_{A-C}$     | 0.660                | 0.621-0.699             | <0.001 |

Abbreviations: A/C, acute/chronic;  $\Delta_{A-C}$ , the difference between acute and chronic glycemia
