# Supplementary material for: A Glycemia-Based Nomogram for Predicting Outcome in Stroke Patients after Endovascular Treatment
Source: MDPI journal article supplement (doi:10.3390/brainsci12111576), 2022-11-18
Supplement: s1 [file s1]

**Table S2 Unadjusted and adjusted ORs of glycemia and other baseline characteristics for three-month mortality**

|                              | Crude OR (95% CI)   | P      | Adjusted OR (95% CI) | P      |
|------------------------------|---------------------|--------|----------------------|--------|
| FBG                          | 1.010(1.007-1.014)  | <0.001 | 1.012(1.006-1.018)   | <0.001 |
| A/C glycemie ratio           | 9.473(4.941-18.164) | <0.001 | 4.783(2.183-10.478)  | <0.001 |
| $\Delta_{A-C}$               | 1.015(1.010-1.019)  | <0.001 | 1.007(1.002-1.011)   | 0.006  |
| Age                          | 1.041(1.024-1.059)  | <0.001 | 1.036(1.014-1.057)   | 0.001  |
| Atrial fibrillation          | 1.805(1.262-2.581)  | 0.001  | 0.775(0.475-1.264)   | 0.308  |
| Serum creatinine             | 1.007(1.002-1.013)  | 0.006  | 1.006(1.001-1.011)   | 0.023  |
| Baseline NIHSS score         | 1.108(1.082-1.136)  | <0.001 | 1.093(1.063-1.123)   | <0.001 |
| Stroke subtypes              | 1.162(0.980-1.377)  | 0.083  |                      |        |
| Infarct circulation          | 0.502(0.322-0.782)  | 0.002  | 0.619(0.343-1.117)   | 0.111  |
| ASITN/SIR                    | 0.467(0.357-0.611)  | <0.001 | 0.638(0.468-0.870)   | 0.005  |
| Door to first recanalization | 1.001(1.000-1.003)  | 0.157  |                      |        |
| Number of devices passed     | 1.349(1.183-1.539)  | <0.001 | 1.279(1.087-1.504)   | 0.003  |
| mTICI score                  | 0.522(0.325-0.839)  | 0.007  | 0.911(0.719-1.155)   | 0.442  |

Adjusted for age, atrial fibrillation, serum creatinine, baseline NIHSS score, stroke subtypes, infarct circulation, ASITN/SIR, door to first recanalization time, number of devices passed and mTICI score

Abbreviations: OR, odds ratio; FBG, fasting blood glucose; A/C, FBG/chronic;  $\Delta_{A-C}$ , the difference between FBG and chronic glycemia
