# Supplementary material for: A Glycemia-Based Nomogram for Predicting Outcome in Stroke Patients after Endovascular Treatment
Source: MDPI journal article supplement (doi:10.3390/brainsci12111576), 2022-11-18
Supplement: s1 [file s1]

**Table S3 Unadjusted and adjusted ORs of glycemia and other baseline characteristics for symptomatic intracranial hemorrhage**

|                          | Crude OR (95% CI)   | P      | Adjusted OR (95% CI) | P     |
|--------------------------|---------------------|--------|----------------------|-------|
| FBG                      | 1.010(1.005-1.015)  | <0.001 | 1.009(1.003-1.015)   | 0.004 |
| A/C glycemic ratio       | 9.293(3.856-22.398) | <0.001 | 5.096(1.804-14.392)  | 0.002 |
| $\Delta_{A-C}$           | 1.017(1.010-1.024)  | <0.001 | 1.012(1.004-1.020)   | 0.003 |
| Age                      | 1.032(1.005-1.060)  | 0.018  | 1.005(0.975-1.036)   | 0.765 |
| Atrial fibrillation      | 2.357(1.302-4.268)  | 0.005  | 0.998(0.477-2.090)   | 0.997 |
| HDL                      | 1.029(0.994-1.066)  | 0.106  |                      |       |
| Baseline NIHSS score     | 1.046(1.012-1.082)  | 0.008  | 1.043(0.996-1.092)   | 0.076 |
| Stroke subtypes          | 1.116(0.854-1.459)  | 0.420  |                      |       |
| Infarct circulation      | 3.045(0.932-9.950)  | 0.065  |                      |       |
| ASITN/SIR                | 0.439(0.293-0.658)  | <0.001 | 0.517(0.334-0.800)   | 0.003 |
| Onset to door time       | 0.997(0.995-0.999)  | 0.009  | 0.998(0.996-1.000)   | 0.078 |
| Number of devices passed | 1.382 (1.139-1.677) | 0.001  | 1.257(1.018-1.552)   | 0.034 |

Adjusted for age, atrial fibrillation, HDL, baseline NIHSS score, stroke subtypes, infarct circulation, ASITN/SIR, onset to door time and number of devices passed

Abbreviations: OR, odds ratio; FBG, fasting blood glucose; A/C, FBG/chronic;  $\Delta_{A-C}$ , the difference between FBG and chronic glycemia
