# Supplementary material for: A Glycemia-Based Nomogram for Predicting Outcome in Stroke Patients after Endovascular Treatment
Source: MDPI journal article supplement (doi:10.3390/brainsci12111576), 2022-11-18
Supplement: s1 [file s1]

Archive with 4 entries (4 files):
- Figure S1.png
- Table S1-Receiver operating characteristic of glycemia to predict poor functional outcome.pdf
- Table S2-three months mortality.pdf
- Table S3-sICH.pdf
