# Supplementary figures and images for: A Glycemia-Based Nomogram for Predicting Outcome in Stroke Patients after Endovascular Treatment
Source: MDPI journal article supplement (doi:10.3390/brainsci12111576), 2022-11-18

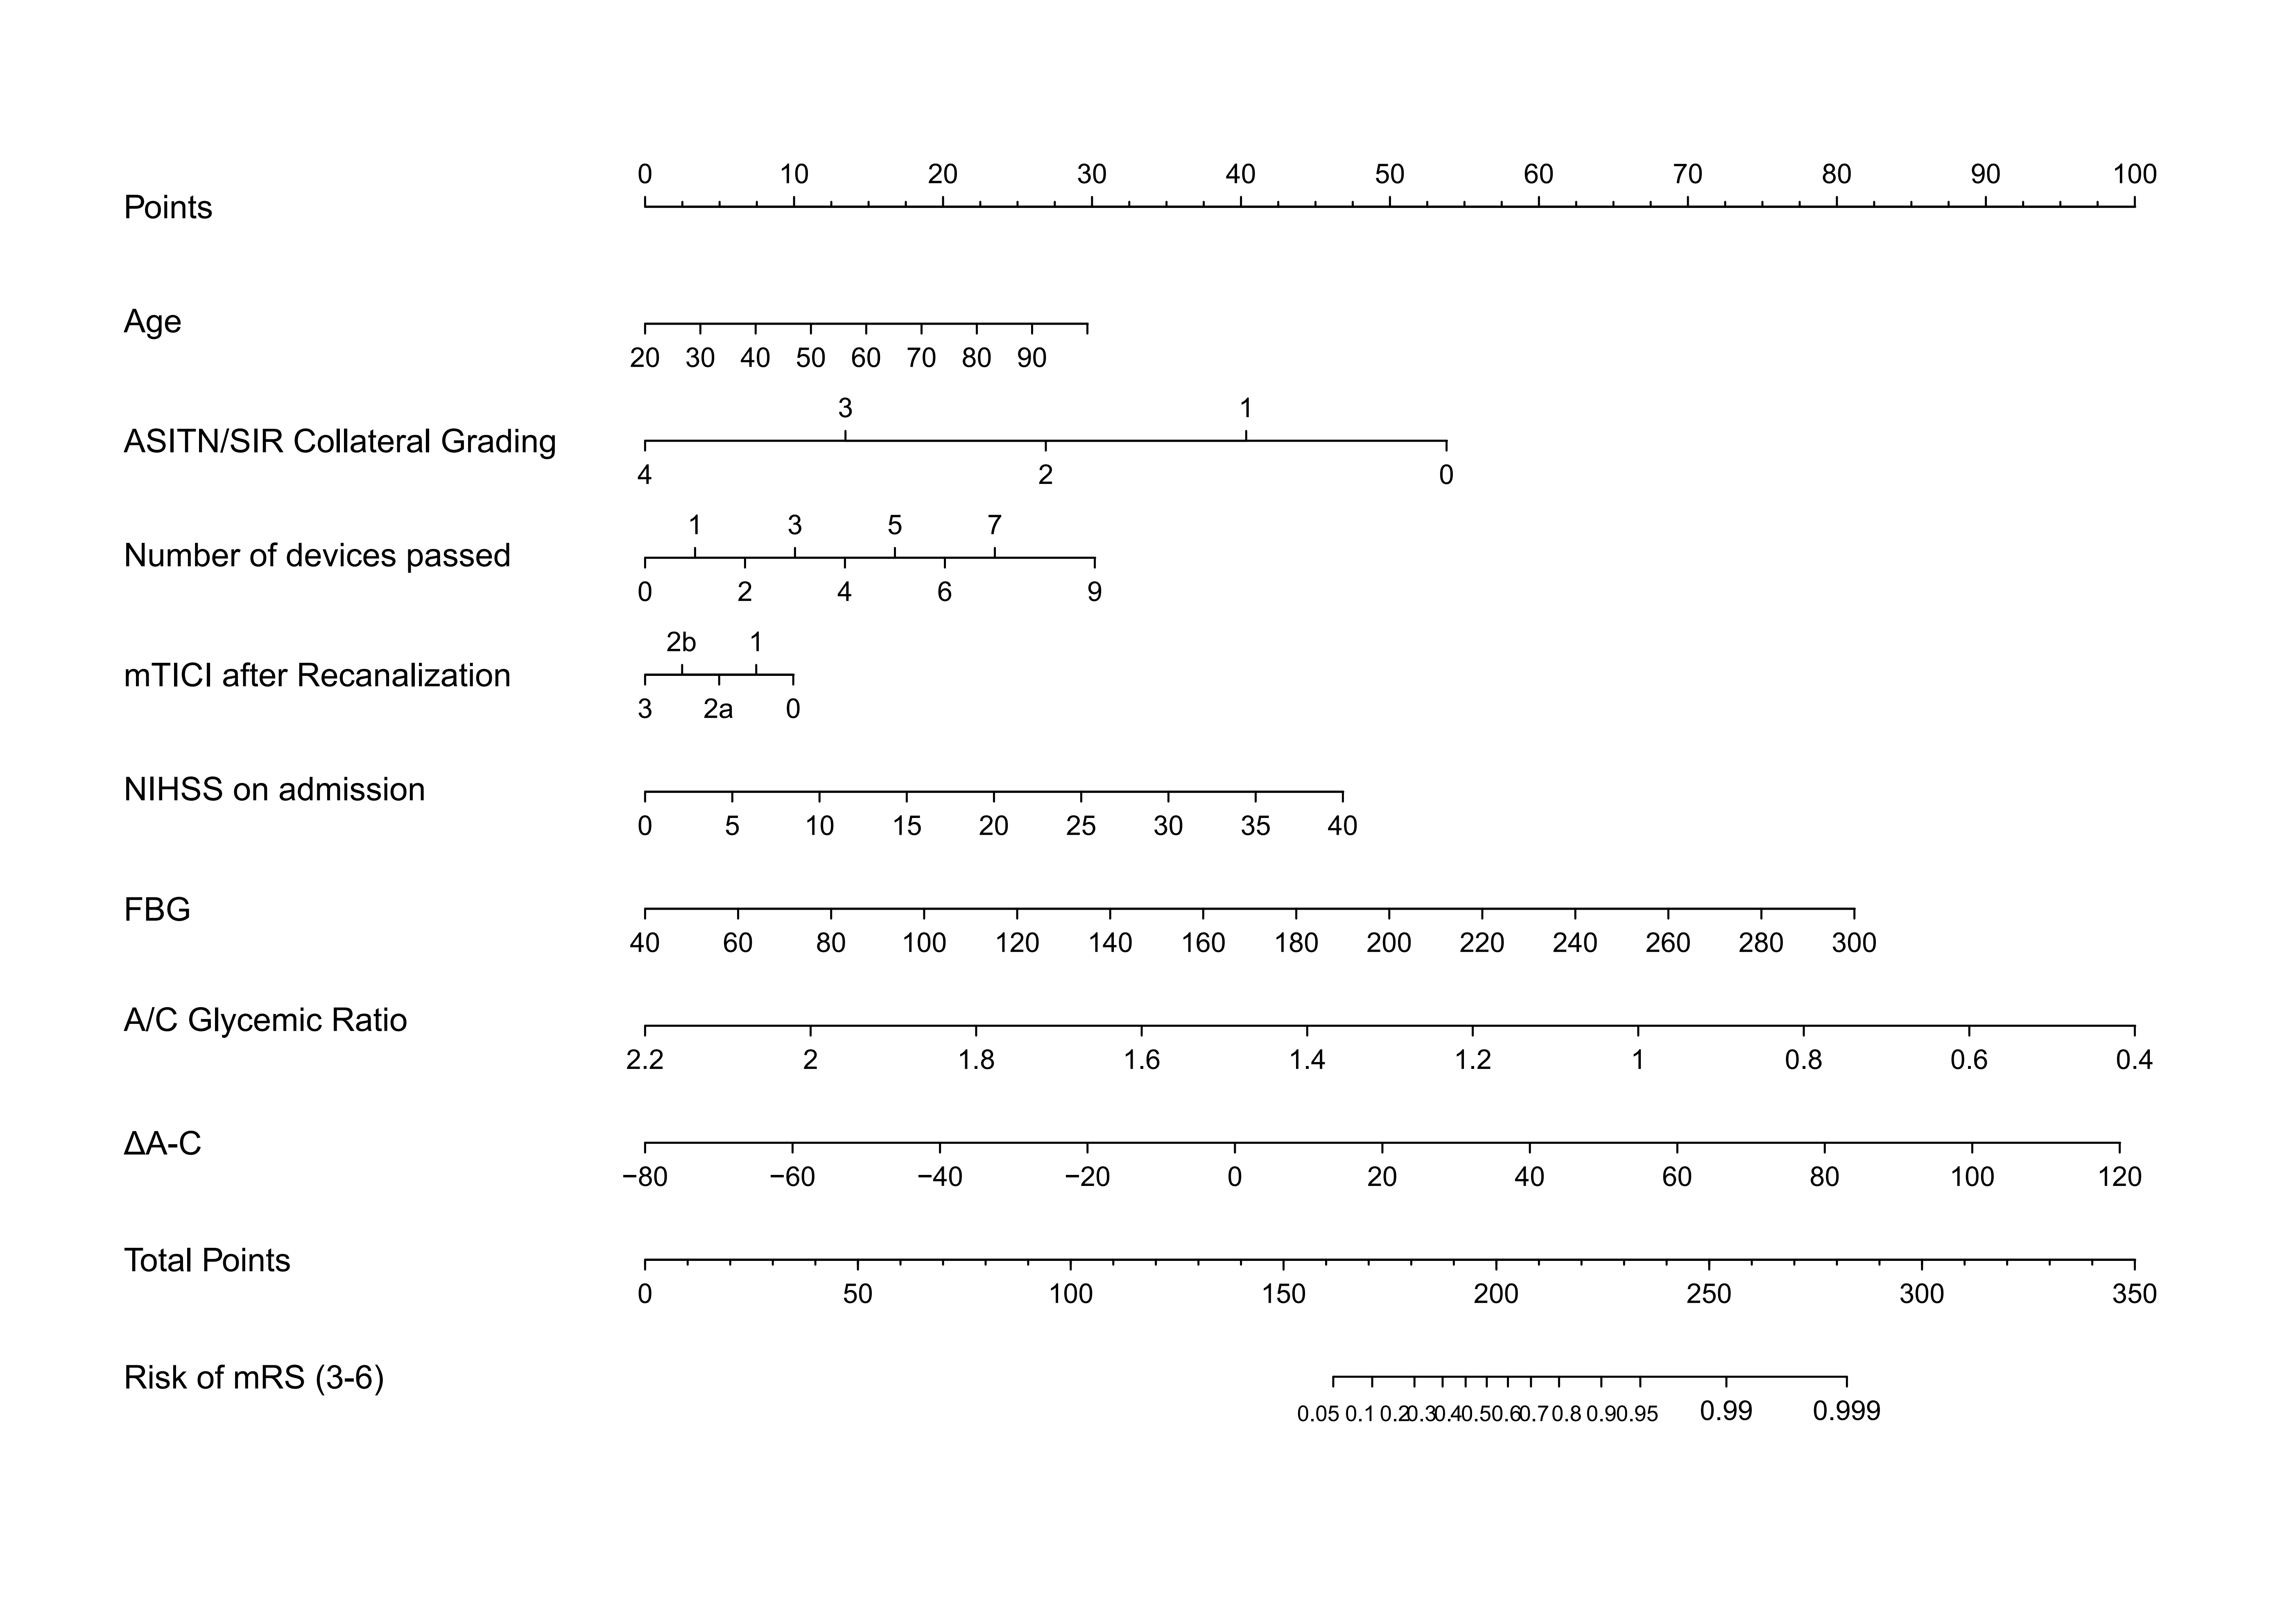

Supplement: s1 [file s1 › Figure S1.png]
